# Supplementary material
Source: PubMed Central journal article supplement (PMC6645902)
Supplement: ao8b00220_si_001.pdf [file ao8b00220_si_001.pdf]

## Supporting Information

# A Synthetic DNA-binding inhibitor of HES1 alters the Notch signaling pathway and induces neuronal differentiation

Yulei Wei†, Ganesh N. Pandian\*‡, Zutao Yu†, Tingting Zou†, Yue Li†, Jayant Darokar§, Kaori Hashiya†, Toshikazu Bando†, and Hiroshi Sugiyama\*†‡

† Kyoto University, Graduate School of Science, Department of Chemistry, Kitashirakawa-Oiwakecho, 606-8502, Kyoto, Japan

‡ Kyoto University, World Premier International Research Center, Institute for Integrated Cell-Material Sciences (WPI-iCeMS), Yoshida-Ushinomiya-cho, 606-8501, Kyoto, Japan

§ Indian Institute of Technology Delhi, Department of Biochemical Engineering and Biotechnology, Hauz Khas, 110-016, New Delhi, India

*KEYWORDS: Synthetic DNA-binding inhibitor, Artificial transcription modulators, Neurogenesis, Regenerative medicine, Therapeutics*

### Table of contents

|                                    |             |
|------------------------------------|-------------|
| Supplementary Figure S1 to S6..... | page S2-S8  |
| Supplementary Table S1 to S3 ..... | page S9-S11 |

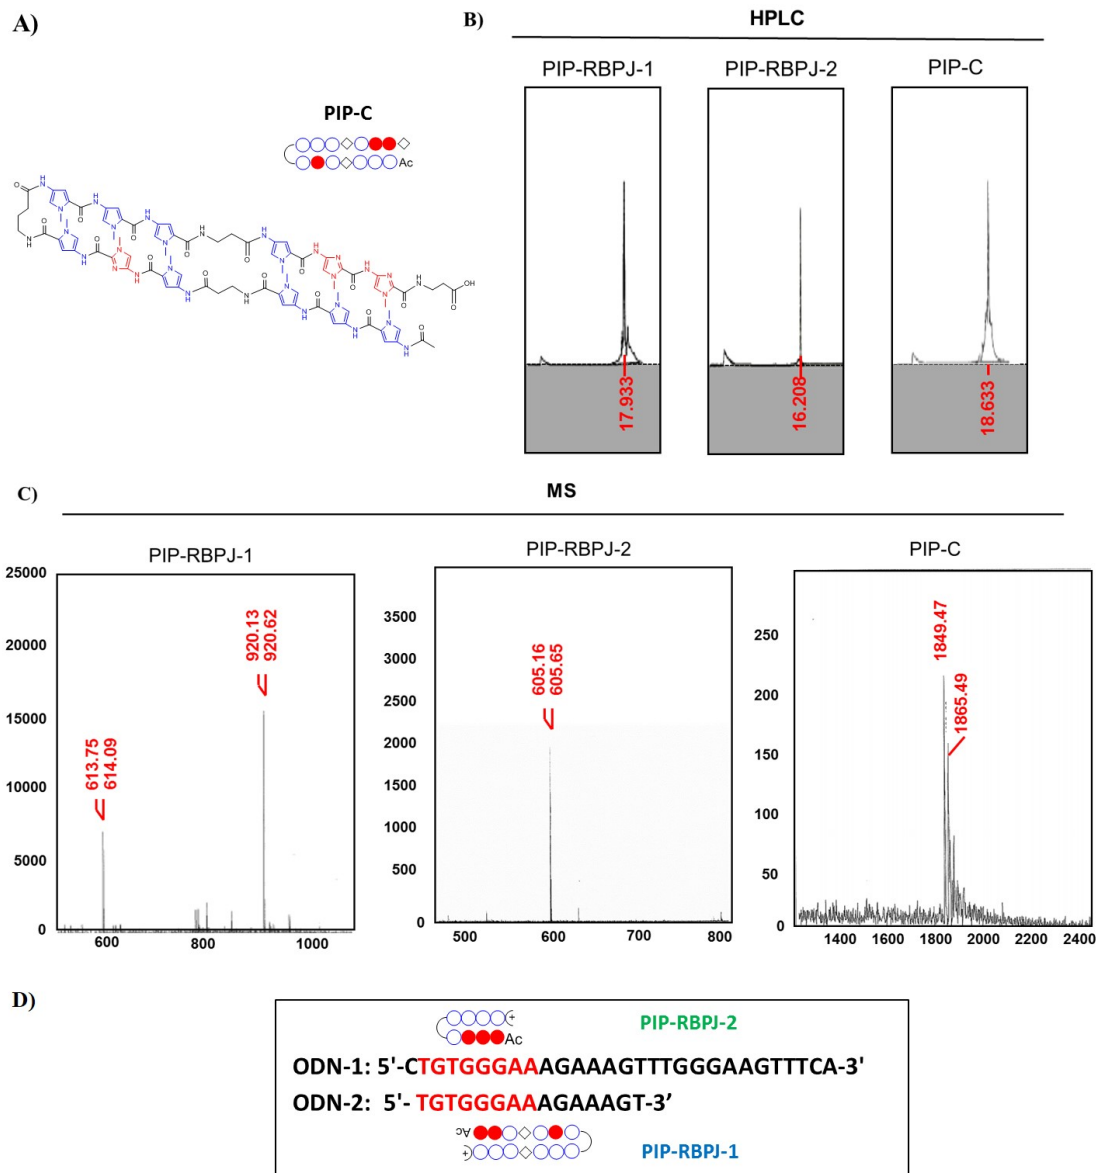

**Figure S1.** **A)** The chemical structure of the control PIP called PIP-C. **B)** HPLC and **C)** MS profile of the PIPs used in this study. **D)** The ODN sequence and binding site of PIPs used in the  $T_m$  assay. Red color stand for the core RBPJ protein binding site.

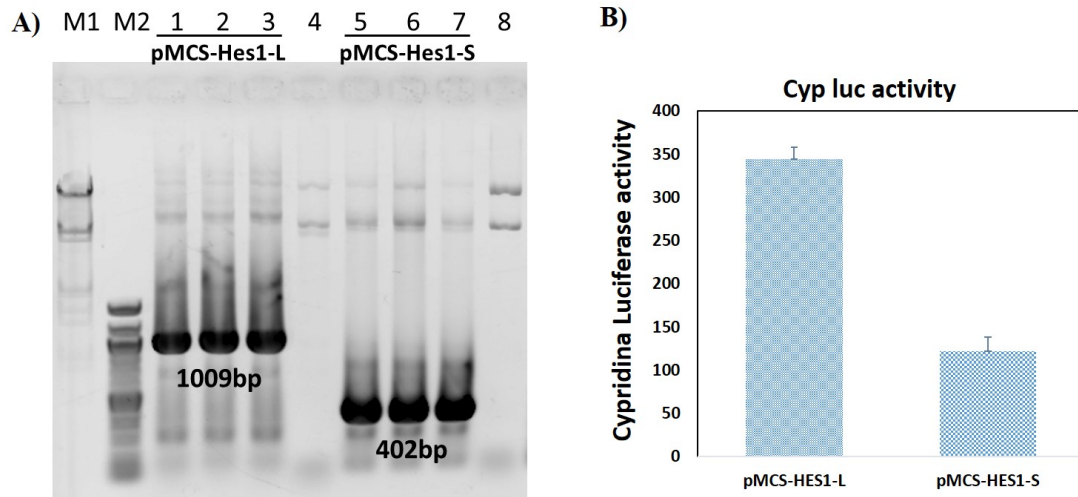

**Figure S2** The design of plasmid for *HES1*. A) The cloning of the plasmid pMCS-HES<sub>1</sub>-L and pMCS-HES<sub>1</sub>-S were checked. The cloned *E.coli* were selected and the plasmid was checked using PCR. The 1009 bp and 402 bp promoter region was correctly inserted into the plasmid. Lanes 4 and 8 represents the negative control without the inserted sequence. B) Luciferase activity of the pMCS-HES<sub>1</sub>-L and pMCS-HES<sub>1</sub>-S plasmids show that the 1008bp inserted promoter exhibited a better luciferase activity.

## Neural Stem Cells

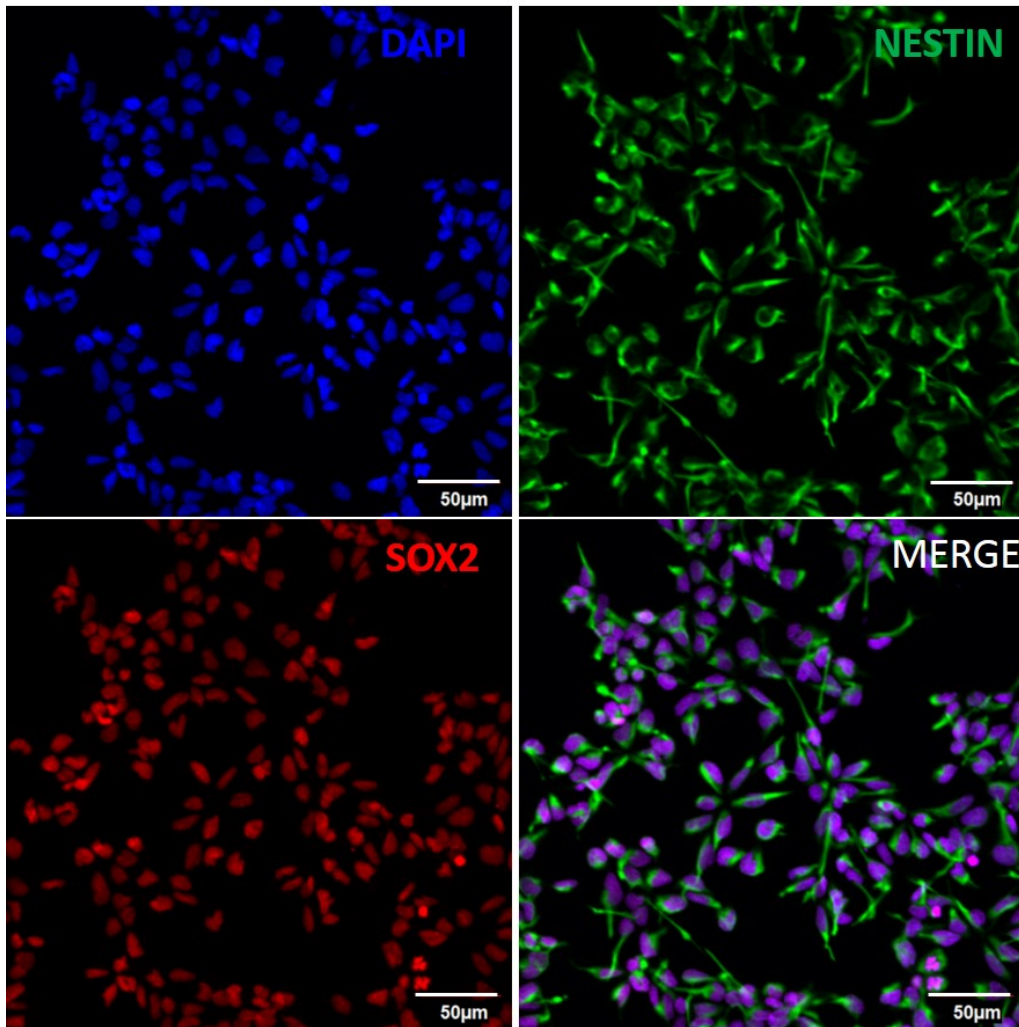

**Figure S3.** Immunostaining of hNSCs with the markers suggesting the presence of undifferentiated cells. Fluorescence image of the hNSCs at P5 with the neuron markers NESTIN (green) and proliferation marker Sox2 (red). Cell nuclei were stained with DAPI (blue).

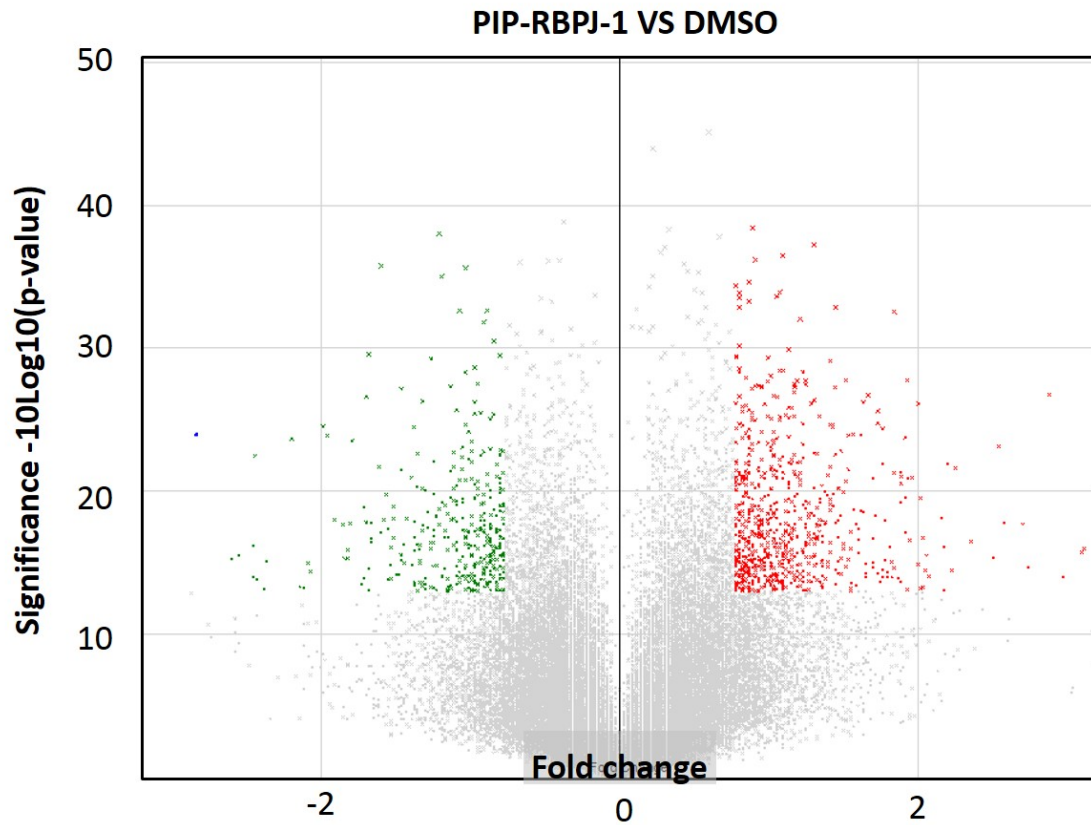

**Figure S4.** Volcano plot of the PIP-RBPJ-1 treated NSCs compared with DMSO treated cell. The red mark indicate the up-regulated genes and the green mark indicate the down-regulated genes with fold change more than 1.3 and  $p$ -value  $< 0.05$ .

A)

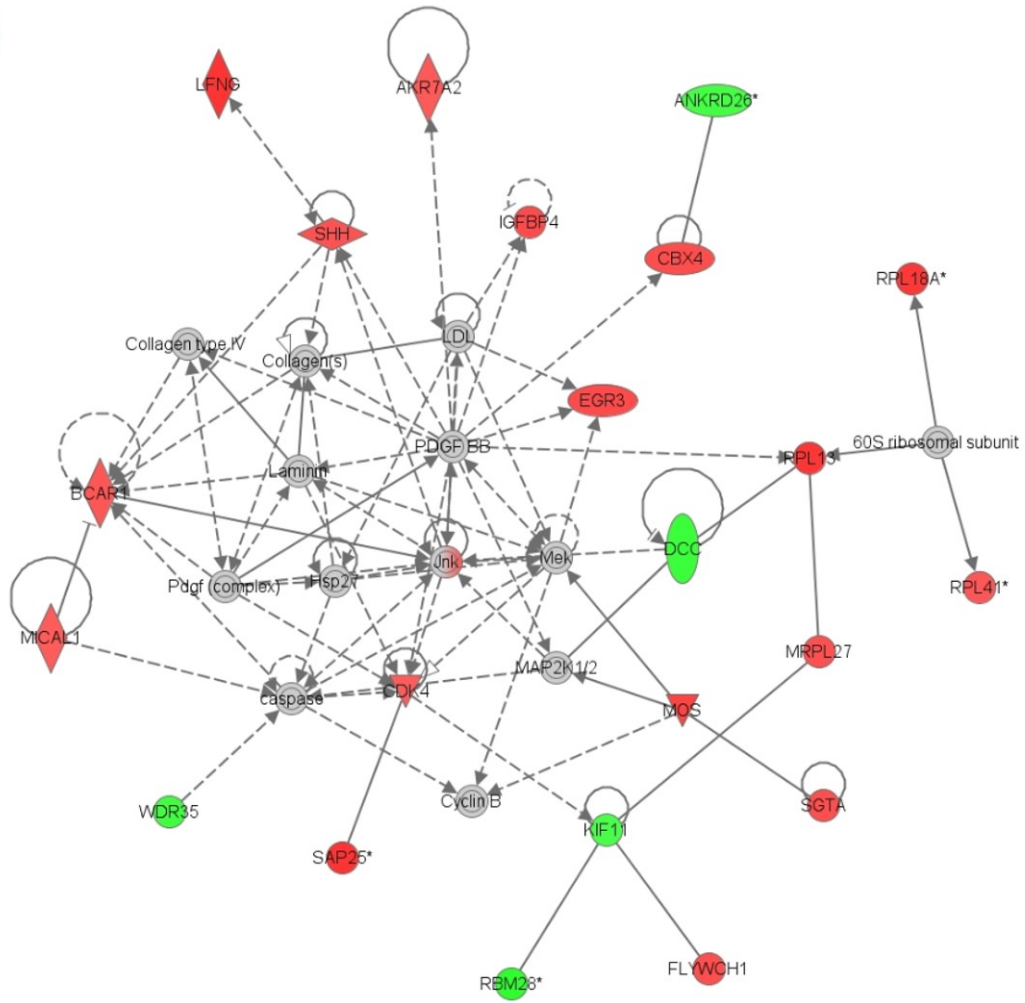

**Neurological disease related Network**

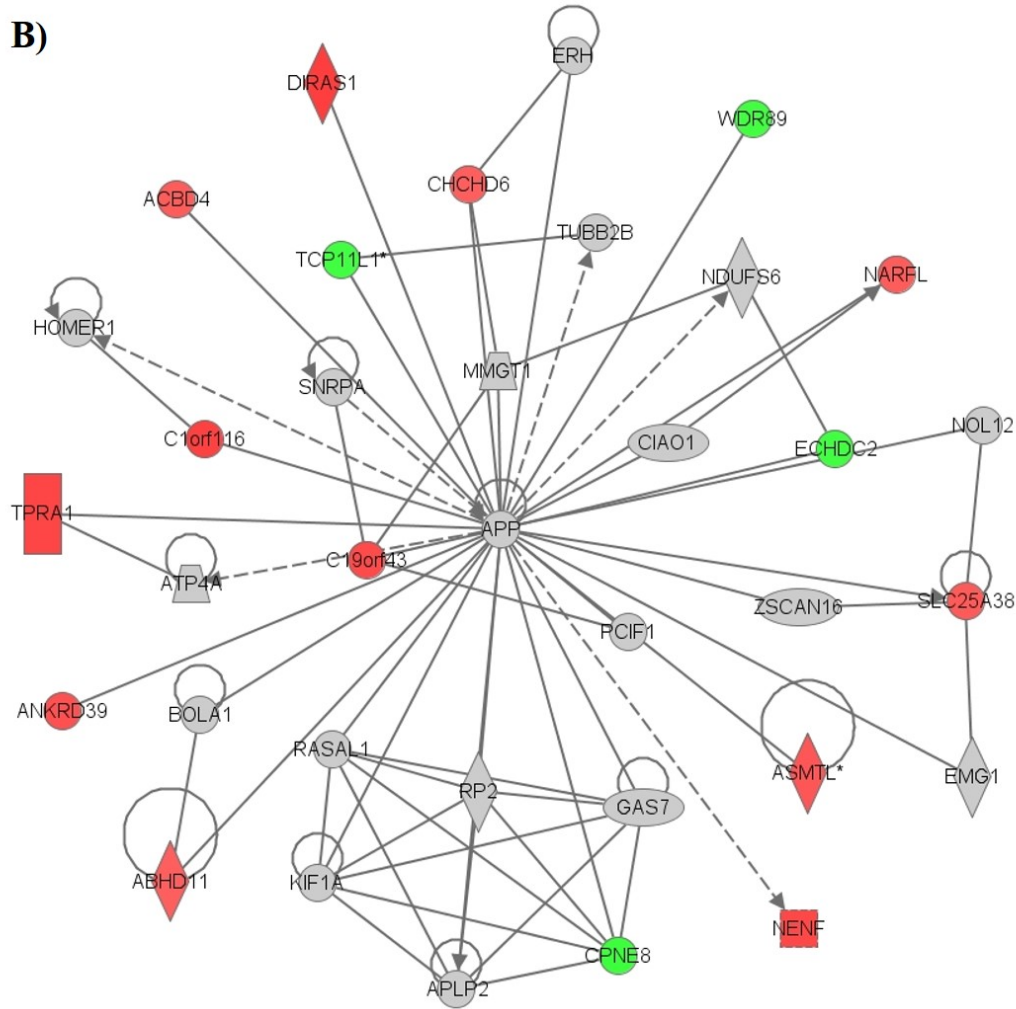

### Neural development and function

**Figure S5.** Network analysis of PIP-RBPJ-1 modulated genes showing the networks associated with A) neurological diseases, B) neural development and function. 1.3-fold induction was chosen as the effect to account for the down-stream effect. Each result is the summary of analysis of data derived from two individual culture plates. Data were analyzed through the use of IPA (Ingenuity® Systems, [www.ingenuity.com](http://www.ingenuity.com)).

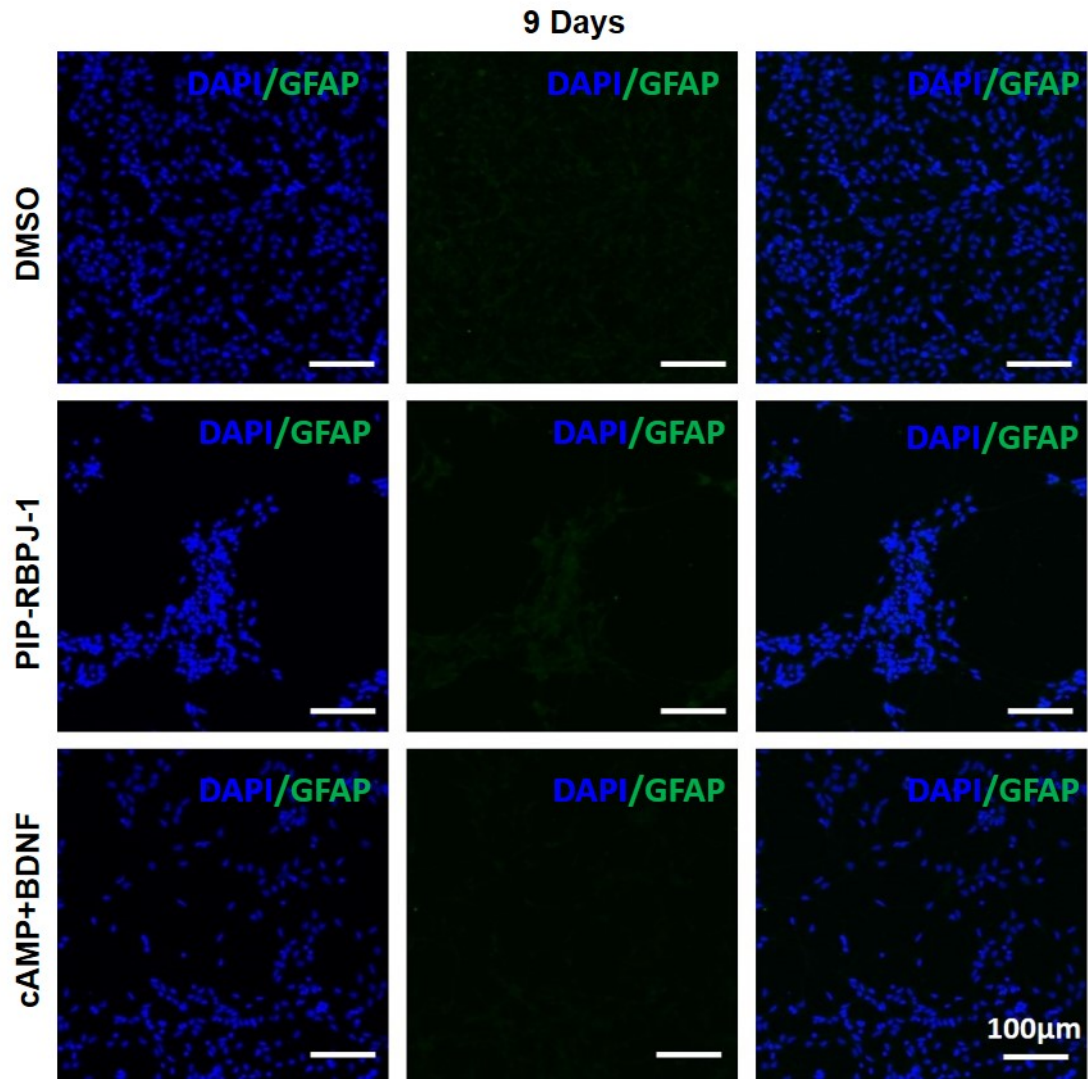

**Figure S6.** Glial fibrillary acidic protein (GFAP) immunostaining of 9 days treatment of hNSCs. The glial cell marker GFAP was stained with Alex488 (Green), cell nuclei were stained with DAPI (blue).



**Table S1 Functions Annotation of the nervous genes modulated in PIP-treated cells**

| <b>Functions Annotation in nervous system</b>                       | <b>p-Value</b> |
|---------------------------------------------------------------------|----------------|
| Outfolding of myelin sheath                                         | 1.27E-03       |
| Proliferation of cerebellar granule cell                            | 2.51E-03       |
| Quantity of lutenizing hormone-releasing hormone neurons            | 4.12E-03       |
| Contact repulsion                                                   | 5.74E-03       |
| Proliferation of motor neurons                                      | 1.11E-02       |
| Synaptic transmission of superior cervical ganglion neurons         | 1.11E-02       |
| Coordination                                                        | 1.45E-02       |
| Proliferation of anterior pituitary cells                           | 1.73E-02       |
| Activation of oxytocin neurons                                      | 2.08E-02       |
| Area of lateral cerebral ventricle                                  | 2.08E-02       |
| Arrest in cell cycle progression of astrocytes                      | 2.08E-02       |
| Curvature of nerves                                                 | 2.08E-02       |
| Development of vestibulocochlear cranial nerve ganglion             | 2.08E-02       |
| Differentiation of Bergmann glia                                    | 2.08E-02       |
| Differentiation of excitatory synapses                              | 2.08E-02       |
| Differentiation of inhibitory synapse                               | 2.08E-02       |
| Exit from cell cycle progression of oligodendrocyte precursor cells | 2.08E-02       |
| Extension of climbing fiber                                         | 2.08E-02       |
| Fission of synaptic vesicles                                        | 2.08E-02       |
| Generation of cholinergic neurons                                   | 2.08E-02       |
| Length of dorsal root ganglion cells                                | 2.08E-02       |
| Morphology of stratum lucidum                                       | 2.08E-02       |
| Quantity of cortical precursor cells                                | 2.08E-02       |
| Quantity of oxytocin neurons                                        | 2.08E-02       |
| Quantity of striatonigral neurons                                   | 2.08E-02       |
| Regeneration of cavernous nerve                                     | 2.08E-02       |
| Synaptic transmission of excitatory synapses                        | 2.08E-02       |
| Synaptic transmission of inhibitory synapse                         | 2.08E-02       |
| Vacuolation of axons                                                | 2.08E-02       |
| Quantity of Purkinje cells                                          | 2.60E-02       |
| Morphology of dorsal root ganglion                                  | 2.72E-02       |
| Proliferation of nervous tissue cell lines                          | 3.30E-02       |
| Cell cycle progression of neurons                                   | 3.32E-02       |
| Myelination of central nervous system                               | 3.56E-02       |
| Morphology of spinal cord                                           | 3.59E-02       |
| Migration of nervous tissue cell lines                              | 3.77E-02       |
| Synaptic transmission of nervous tissue                             | 4.05E-02       |

**Table S2** The calculated neuron efficiency and neurite length difference of PIPs and the DMSO-treated hNSCs.

|                   | <b>Neuron Efficiency</b> | <b>Neurite Length</b> |
|-------------------|--------------------------|-----------------------|
| <b>DMSO</b>       | 12.4%                    | 62.6                  |
| <b>PIP-RBPJ-1</b> | 42.3%                    | 117.5                 |
| <b>PIP-RBPJ-2</b> | 14.4%                    | 59.1                  |

**Table S3 Primers used in q-RT PCR and *HES1* plasmid construction**

| <b>q-RT-PCR</b>       |                           |                            |
|-----------------------|---------------------------|----------------------------|
|                       | <b>Forward sequence</b>   | <b>Reward sequence</b>     |
| <b><i>HES1</i></b>    | ACGACACCGGATAAACCAAA      | CGGAGGTGCTTCACTGTCAT       |
| <b><i>ASCL1</i></b>   | GTGCGTGTTAGAGGTGATGG      | TGCACTCCAATCATTACG         |
| <b><i>NGN2</i></b>    | GGGACAGGAAAGGGAACC        | TCAGACATGGACTATTGGCAG      |
| <b><i>NOTCH1</i></b>  | GAACCAATACAACCCTCTGCG     | TAGCTCATCATCTGGGACAGG      |
| <b><i>DLL1</i></b>    | ACAGCAAGCGTGACACCAAG      | TGAAGTTGAACAGCCCGAGT       |
| <b><i>JAG1</i></b>    | GTCGGGATTTGGTTAATGGTTATCG | TCACTGGCACGGTTGTAGCAC      |
| <b><i>TUJ1</i></b>    | GCTCAGGGGCCTTTGGACATCTCTT | TTTTCACACTCCTCCGCACCCACATC |
| <b><i>ACTIN-β</i></b> | CAATGTGGCCGAGGACTTTG      | CATTCTCCTTAGAGAGAAGTGG     |

  

| <b><i>HES1</i> promoter cloning</b> |                              |                                |
|-------------------------------------|------------------------------|--------------------------------|
|                                     | <b>Forward sequence</b>      | <b>Reward sequence</b>         |
| <b><i>HES1-L</i></b>                | CGGAATTCGCAGAACCTAAAGCCTACGG | CCCAAGCTTCACAAACTACTGAGCAAGTGC |
| <b><i>HES1-S</i></b>                | CGGAATTCCAAAGCCCAGAGGGAGAGT  | CCCAAGCTTCACAAACTACTGAGCAAGTGC |
